# Supplementary material
Source: publisher figshare collection journal article supplement (https://karger.figshare.com/ndownloader/files/23147180)
Supplement: Supplementary file 1 [file 23147180]

## Sheet: +2h Curated Pathways
2h Curated Pathways UPREG
		GS	GS DETAILS	SIZE	ES	NES	NOM p-val	FDR q-val	FWER p-val	RANK AT MAX	LEADING EDGE
		follow link to MSigDB
	1	KEGG_DNA_REPLICATION	Details ...	35	0.89	3.09	0	0	0	1135	tags=83%, list=8%, signal=90%
	2	REACTOME_DNA_STRAND_ELONGATION	Details ...	30	0.9	3.03	0	0	0	1102	tags=87%, list=8%, signal=94%
	3	REACTOME_EXTENSION_OF_TELOMERES	Details ...	27	0.89	3	0	0	0	902	tags=70%, list=6%, signal=75%
	4	REACTOME_S_PHASE	Details ...	103	0.68	2.96	0	0	0	983	tags=45%, list=7%, signal=48%
	5	REACTOME_TELOMERE_MAINTENANCE	Details ...	59	0.72	2.83	0	0	0	1790	tags=56%, list=12%, signal=63%
	6	REACTOME_SYNTHESIS_OF_DNA	Details ...	88	0.67	2.82	0	0	0	1102	tags=45%, list=8%, signal=49%
	7	REACTOME_LAGGING_STRAND_SYNTHESIS	Details ...	19	0.91	2.8	0	0	0	902	tags=84%, list=6%, signal=90%
	8	REACTOME_G1_S_TRANSITION	Details ...	102	0.61	2.72	0	0	0	1064	tags=39%, list=7%, signal=42%
	9	REACTOME_ACTIVATION_OF_THE_PRE_REPLICATIVE_COMPLEX	Details ...	29	0.82	2.68	0	0	0	983	tags=69%, list=7%, signal=74%
	10	REACTOME_MITOTIC_G1_G1_S_PHASES	Details ...	124	0.6	2.66	0	0	0	1064	tags=36%, list=7%, signal=39%
	11	VERNELL_RETINOBLASTOMA_PATHWAY_UP	Details ...	65	0.66	2.64	0	0	0	1129	tags=43%, list=8%, signal=46%
	12	KAUFFMANN_DNA_REPLICATION_GENES	Details ...	127	0.59	2.64	0	0	0	983	tags=37%, list=7%, signal=39%
	13	REACTOME_E2F_MEDIATED_REGULATION_OF_DNA_REPLICATION	Details ...	32	0.76	2.63	0	0	0	1064	tags=59%, list=7%, signal=64%
	14	KEGG_MISMATCH_REPAIR	Details ...	22	0.85	2.62	0	0	0	902	tags=64%, list=6%, signal=68%
	15	KAUFFMANN_MELANOMA_RELAPSE_UP	Details ...	58	0.65	2.6	0	0	0	1796	tags=45%, list=12%, signal=51%
	16	REACTOME_PROCESSIVE_SYNTHESIS_ON_THE_LAGGING_STRAND	Details ...	15	0.94	2.6	0	0	0	902	tags=93%, list=6%, signal=99%
	17	KEGG_NUCLEOTIDE_EXCISION_REPAIR	Details ...	43	0.7	2.57	0	0	0	913	tags=37%, list=6%, signal=40%
	18	BURTON_ADIPOGENESIS_PEAK_AT_16HR	Details ...	37	0.71	2.54	0	0	0	983	tags=54%, list=7%, signal=58%
	19	BILANGES_SERUM_AND_RAPAMYCIN_SENSITIVE_GENES	Details ...	66	0.63	2.54	0	0	0	1762	tags=48%, list=12%, signal=55%
	20	SONG_TARGETS_OF_IE86_CMV_PROTEIN	Details ...	58	0.65	2.51	0	0	0	983	tags=45%, list=7%, signal=48%
	21	STEIN_ESRRA_TARGETS_RESPONSIVE_TO_ESTROGEN_DN		37	0.72	2.51	0	0	0	535	tags=46%, list=4%, signal=48%
	22	REACTOME_GLOBAL_GENOMIC_NER_GG_NER		32	0.73	2.5	0	0	0	913	tags=41%, list=6%, signal=43%
	23	REACTOME_M_G1_TRANSITION		75	0.6	2.48	0	0	0	2721	tags=56%, list=19%, signal=68%
	24	WHITFIELD_CELL_CYCLE_G1_S		115	0.56	2.46	0	0	0	1561	tags=34%, list=11%, signal=38%
	25	REACTOME_CHROMOSOME_MAINTENANCE		96	0.57	2.43	0	0	0	1790	tags=41%, list=12%, signal=46%
	26	WANG_RESPONSE_TO_GSK3_INHIBITOR_SB216763_DN		309	0.47	2.43	0	0	0	2127	tags=38%, list=15%, signal=43%
	27	ZAMORA_NOS2_TARGETS_UP		58	0.62	2.42	0	0	0	1732	tags=38%, list=12%, signal=43%
	28	REACTOME_PEPTIDE_CHAIN_ELONGATION		80	0.57	2.4	0	0	0	1283	tags=36%, list=9%, signal=40%
	29	REACTOME_TRANSLATION		137	0.52	2.39	0	0	0	1410	tags=32%, list=10%, signal=35%
	30	REACTOME_INFLUENZA_VIRAL_RNA_TRANSCRIPTION_AND_REPLICATION		96	0.56	2.38	0	0	0	2969	tags=50%, list=20%, signal=62%
	31	REACTOME_FORMATION_OF_THE_TERNARY_COMPLEX_AND_SUBSEQUENTLY_THE_43S_COMPLEX		44	0.64	2.38	0	0	0	1807	tags=48%, list=12%, signal=54%
	32	REACTOME_TRANSCRIPTION_COUPLED_NER_TC_NER		43	0.65	2.38	0	0	0.001	1240	tags=33%, list=8%, signal=35%
	33	STEIN_ESR1_TARGETS		72	0.58	2.37	0	0	0.001	878	tags=31%, list=6%, signal=32%
	34	BIOCARTA_P53_PATHWAY		15	0.83	2.36	0	0	0.001	711	tags=60%, list=5%, signal=63%
	35	KEGG_RIBOSOME		82	0.56	2.36	0	0	0.001	2921	tags=49%, list=20%, signal=61%
	36	KEGG_BASE_EXCISION_REPAIR		33	0.67	2.35	0	0	0.001	902	tags=42%, list=6%, signal=45%
	37	REACTOME_G1_S_SPECIFIC_TRANSCRIPTION		17	0.79	2.35	0	0	0.001	1064	tags=76%, list=7%, signal=82%
	38	CHNG_MULTIPLE_MYELOMA_HYPERPLOID_UP		50	0.61	2.34	0	0	0.001	2037	tags=40%, list=14%, signal=46%
	39	REACTOME_NUCLEOTIDE_EXCISION_REPAIR		48	0.61	2.34	0	0	0.001	913	tags=29%, list=6%, signal=31%
	40	REACTOME_3_UTR_MEDIATED_TRANSLATIONAL_REGULATION		98	0.54	2.31	0	0	0.002	2037	tags=40%, list=14%, signal=46%
	41	BIOCARTA_MCM_PATHWAY		17	0.8	2.31	0	0	0.002	983	tags=71%, list=7%, signal=76%
	42	REACTOME_ACTIVATION_OF_ATR_IN_RESPONSE_TO_REPLICATION_STRESS		35	0.65	2.3	0	0	0.002	983	tags=46%, list=7%, signal=49%
	43	ZHANG_RESPONSE_TO_CANTHARIDIN_DN		63	0.58	2.29	0	0	0.002	2815	tags=52%, list=19%, signal=65%
	44	REACTOME_SRP_DEPENDENT_COTRANSLATIONAL_PROTEIN_TARGETING_TO_MEMBRANE		102	0.53	2.28	0	0	0.002	1283	tags=31%, list=9%, signal=34%
	45	REN_BOUND_BY_E2F		58	0.58	2.27	0	0	0.002	851	tags=38%, list=6%, signal=40%
	46	ZHANG_TLX_TARGETS_DN		85	0.55	2.27	0	0	0.002	1505	tags=34%, list=10%, signal=38%
	47	KEGG_PYRIMIDINE_METABOLISM		84	0.53	2.26	0	0	0.003	2518	tags=42%, list=17%, signal=50%
	48	REACTOME_MEIOTIC_RECOMBINATION		61	0.57	2.23	0	0	0.005	1796	tags=39%, list=12%, signal=45%
	49	WHITFIELD_CELL_CYCLE_S		128	0.49	2.2	0	0	0.008	1797	tags=31%, list=12%, signal=35%
	50	REACTOME_RESOLUTION_OF_AP_SITES_VIA_THE_MULTIPLE_NUCLEOTIDE_PATCH_REPLACEMENT_PATHWAY		16	0.78	2.2	0	0	0.009	902	tags=50%, list=6%, signal=53%
	51	REACTOME_ASSEMBLY_OF_THE_PRE_REPLICATIVE_COMPLEX		61	0.55	2.2	0	0	0.009	2620	tags=51%, list=18%, signal=62%
2h Curated Pathways DOWNREG
		GS	GS DETAILS	SIZE	ES	NES	NOM p-val	FDR q-val	FWER p-val	RANK AT MAX	LEADING EDGE
		follow link to MSigDB
	1	AMUNDSON_GAMMA_RADIATION_RESPONSE	Details ...	38	-0.79	-2.64	0	0	0	927	tags=55%, list=6%, signal=59%
	2	WHITFIELD_CELL_CYCLE_G2_M	Details ...	183	-0.6	-2.61	0	0	0	1469	tags=37%, list=10%, signal=40%
	3	SMIRNOV_RESPONSE_TO_IR_6HR_DN	Details ...	73	-0.65	-2.48	0	0	0	1396	tags=45%, list=10%, signal=50%
	4	NAKAYAMA_SOFT_TISSUE_TUMORS_PCA2_UP	Details ...	66	-0.65	-2.43	0	0	0	1645	tags=48%, list=11%, signal=54%
	5	WHITFIELD_CELL_CYCLE_G2	Details ...	151	-0.56	-2.37	0	0	0	1631	tags=35%, list=11%, signal=39%
	6	TANG_SENESCENCE_TP53_TARGETS_DN	Details ...	49	-0.66	-2.33	0	0	0	927	tags=43%, list=6%, signal=46%
	7	NAKAYAMA_SOFT_TISSUE_TUMORS_PCA1_UP	Details ...	28	-0.75	-2.31	0	0	0	2365	tags=64%, list=16%, signal=77%
	8	REICHERT_MITOSIS_LIN9_TARGETS	Details ...	28	-0.73	-2.29	0	0	0.001	472	tags=43%, list=3%, signal=44%
	9	MCLACHLAN_DENTAL_CARIES_UP	Details ...	110	-0.55	-2.23	0	0	0.004	1243	tags=29%, list=8%, signal=32%
	10	LY_AGING_MIDDLE_DN	Details ...	15	-0.82	-2.2	0	0.001	0.005	1153	tags=73%, list=8%, signal=80%
	11	TAKEDA_TARGETS_OF_NUP98_HOXA9_FUSION_10D_DN	Details ...	69	-0.57	-2.17	0	0.001	0.008	608	tags=25%, list=4%, signal=26%
	12	MARTORIATI_MDM4_TARGETS_FETAL_LIVER_DN	Details ...	435	-0.45	-2.14	0	0.002	0.017	3260	tags=42%, list=22%, signal=52%
	13	PID_PLK1_PATHWAY	Details ...	44	-0.6	-2.13	0	0.002	0.022	838	tags=41%, list=6%, signal=43%
	14	LIAN_LIPA_TARGETS_3M	Details ...	28	-0.67	-2.12	0	0.002	0.024	1442	tags=36%, list=10%, signal=40%
	15	ZHOU_CELL_CYCLE_GENES_IN_IR_RESPONSE_24HR	Details ...	113	-0.51	-2.07	0	0.004	0.054	1034	tags=35%, list=7%, signal=37%
	16	PID_AURORA_B_PATHWAY	Details ...	37	-0.63	-2.06	0	0.004	0.056	1280	tags=38%, list=9%, signal=41%
	17	XU_HGF_TARGETS_INDUCED_BY_AKT1_48HR_DN	Details ...	18	-0.72	-2.05	0	0.005	0.072	1016	tags=44%, list=7%, signal=48%
	18	MORI_LARGE_PRE_BII_LYMPHOCYTE_DN	Details ...	39	-0.61	-2.05	0	0.004	0.072	2158	tags=41%, list=15%, signal=48%

## Sheet: +2h GO
2h GO UPREG
	NAME	GS<br> follow link to MSigDB	GS DETAILS	SIZE	ES	NES	NOM p-val	FDR q-val	FWER p-val	RANK AT MAX	LEADING EDGE
	GO_DNA_DEPENDENT_DNA_REPLICATION	GO_DNA_DEPENDENT_DNA_REPLICATION	Details ...	91	0.707303	3.00009	0	0	0	1102	tags=43%, list=8%, signal=46%
	GO_TELOMERE_MAINTENANCE_VIA_RECOMBINATION	GO_TELOMERE_MAINTENANCE_VIA_RECOMBINATION	Details ...	32	0.834787	2.85597	0	0	0	1052	tags=66%, list=7%, signal=71%
	GO_DNA_REPLICATION_INITIATION	GO_DNA_REPLICATION_INITIATION	Details ...	27	0.869366	2.81363	0	0	0	983	tags=70%, list=7%, signal=75%
	GO_DNA_REPLICATION	GO_DNA_REPLICATION	Details ...	191	0.5778	2.77495	0	0	0	983	tags=34%, list=7%, signal=35%
	GO_DNA_STRAND_ELONGATION	GO_DNA_STRAND_ELONGATION	Details ...	30	0.809965	2.76336	0	0	0	1102	tags=60%, list=8%, signal=65%
	GO_MITOTIC_RECOMBINATION	GO_MITOTIC_RECOMBINATION	Details ...	41	0.762355	2.73605	0	0	0	1052	tags=51%, list=7%, signal=55%
	GO_CELL_CYCLE_G1_S_PHASE_TRANSITION	GO_CELL_CYCLE_G1_S_PHASE_TRANSITION	Details ...	101	0.630819	2.72219	0	0	0	1064	tags=43%, list=7%, signal=46%
	GO_DNA_STRAND_ELONGATION_INVOLVED_IN_DNA_REPLICATION	GO_DNA_STRAND_ELONGATION_INVOLVED_IN_DNA_REPLICATION	Details ...	25	0.846485	2.66412	0	0	0	1102	tags=72%, list=8%, signal=78%
	GO_MISMATCH_REPAIR	GO_MISMATCH_REPAIR	Details ...	24	0.818134	2.59709	0	0	0	913	tags=50%, list=6%, signal=53%
	GO_REPLICATION_FORK	GO_REPLICATION_FORK	Details ...	60	0.65453	2.59115	0	0	0	1820	tags=52%, list=12%, signal=59%
	GO_REPLISOME	GO_REPLISOME	Details ...	28	0.771156	2.5694	0	0	0	975	tags=61%, list=7%, signal=65%
	GO_TELOMERE_ORGANIZATION	GO_TELOMERE_ORGANIZATION	Details ...	92	0.605418	2.55163	0	0	0	2032	tags=43%, list=14%, signal=50%
	GO_NUCLEAR_REPLICATION_FORK	GO_NUCLEAR_REPLICATION_FORK	Details ...	38	0.711526	2.54796	0	0	0	1421	tags=55%, list=10%, signal=61%
	GO_DNA_SYNTHESIS_INVOLVED_IN_DNA_REPAIR	GO_DNA_SYNTHESIS_INVOLVED_IN_DNA_REPAIR	Details ...	66	0.615734	2.49108	0	0	0	1820	tags=42%, list=12%, signal=48%
	GO_DNA_BIOSYNTHETIC_PROCESS	GO_DNA_BIOSYNTHETIC_PROCESS	Details ...	105	0.554982	2.44542	0	0	0	1170	tags=31%, list=8%, signal=34%
	GO_DNA_REPLICATION_DEPENDENT_NUCLEOSOME_ORGANIZATION	GO_DNA_REPLICATION_DEPENDENT_NUCLEOSOME_ORGANIZATION	Details ...	26	0.734958	2.42964	0	0	0	2032	tags=54%, list=14%, signal=62%
	GO_NUCLEOTIDE_EXCISION_REPAIR_DNA_GAP_FILLING	GO_NUCLEOTIDE_EXCISION_REPAIR_DNA_GAP_FILLING	Details ...	24	0.757239	2.40117	0	0	0	902	tags=50%, list=6%, signal=53%
	GO_DNA_DAMAGE_RESPONSE_DETECTION_OF_DNA_DAMAGE	GO_DNA_DAMAGE_RESPONSE_DETECTION_OF_DNA_DAMAGE	Details ...	35	0.675487	2.37371	0	0	0	902	tags=40%, list=6%, signal=43%
	GO_DNA_RECOMBINATION	GO_DNA_RECOMBINATION	Details ...	175	0.493794	2.34802	0	3.61608e-05	0.001	1170	tags=26%, list=8%, signal=28%
	GO_PROTEIN_DNA_COMPLEX	GO_PROTEIN_DNA_COMPLEX	Details ...	129	0.518842	2.34075	0	3.43528e-05	0.001	1790	tags=38%, list=12%, signal=43%
	GO_REGULATION_OF_TRANSCRIPTION_INVOLVED_IN_G1_S_TRANSITION_OF_MITOTIC_CELL_CYCLE	GO_REGULATION_OF_TRANSCRIPTION_INVOLVED_IN_G1_S_TRANSITION_OF_MITOTIC_CELL_CYCLE		25	0.73015	2.3185	0	6.54571e-05	0.002	1064	tags=60%, list=7%, signal=65%
	GO_CYTOSOLIC_RIBOSOME	GO_CYTOSOLIC_RIBOSOME		98	0.524236	2.28289	0	9.27848e-05	0.003	2921	tags=48%, list=20%, signal=59%
	GO_ELECTRON_TRANSPORT_CHAIN	GO_ELECTRON_TRANSPORT_CHAIN		87	0.543725	2.28286	0	8.87507e-05	0.003	3264	tags=53%, list=22%, signal=68%
	GO_DNA_DIRECTED_DNA_POLYMERASE_ACTIVITY	GO_DNA_DIRECTED_DNA_POLYMERASE_ACTIVITY		26	0.7002	2.27426	0	8.50528e-05	0.003	975	tags=50%, list=7%, signal=53%
	GO_NUCLEAR_NUCLEOSOME	GO_NUCLEAR_NUCLEOSOME		25	0.698747	2.26459	0	8.16507e-05	0.003	2747	tags=56%, list=19%, signal=69%
	GO_BASE_EXCISION_REPAIR	GO_BASE_EXCISION_REPAIR		37	0.627416	2.26102	0	7.85102e-05	0.003	927	tags=32%, list=6%, signal=35%
	GO_RIBOSOMAL_SUBUNIT	GO_RIBOSOMAL_SUBUNIT		149	0.492015	2.25649	0	7.56025e-05	0.003	2979	tags=44%, list=20%, signal=54%
	GO_DNA_POLYMERASE_ACTIVITY	GO_DNA_POLYMERASE_ACTIVITY		33	0.645068	2.25478	0	7.29024e-05	0.003	975	tags=39%, list=7%, signal=42%
	GO_OXIDATIVE_PHOSPHORYLATION	GO_OXIDATIVE_PHOSPHORYLATION		77	0.544201	2.24667	0	7.03885e-05	0.003	3264	tags=53%, list=22%, signal=68%
2 h GO DOWNREG
	NAME	GS<br> follow link to MSigDB	GS DETAILS	SIZE	ES	NES	NOM p-val	FDR q-val	FWER p-val	RANK AT MAX	LEADING EDGE
	GO_MITOTIC_SPINDLE	GO_MITOTIC_SPINDLE	Details ...	47	-0.652903	-2.29122	0	0	0	903	tags=43%, list=6%, signal=45%

## Sheet: +9h Curated Pathways
9h Curated Pathways UPREG		GS	GS DETAILS	SIZE	ES	NES	NOM p-val	FDR q-val	FWER p-val	RANK AT MAX	LEADING EDGE
		follow link to MSigDB
	1	QUINTENS_EMBRYONIC_BRAIN_RESPONSE_TO_IR	Details ...	66	0.77	2.97	0	0	0	1424	tags=52%, list=9%, signal=57%
	2	MARTORIATI_MDM4_TARGETS_NEUROEPITHELIUM_UP	Details ...	142	0.59	2.55	0	0	0	1942	tags=38%, list=13%, signal=43%
	3	ONGUSAHA_TP53_TARGETS	Details ...	28	0.76	2.42	0	0	0	608	tags=39%, list=4%, signal=41%
	4	STARK_PREFRONTAL_CORTEX_22Q11_DELETION_UP	Details ...	179	0.52	2.34	0	0	0.001	3474	tags=52%, list=23%, signal=67%
	5	DAZARD_RESPONSE_TO_UV_NHEK_DN	Details ...	276	0.49	2.34	0	0	0.001	3641	tags=48%, list=24%, signal=62%
	6	DACOSTA_UV_RESPONSE_VIA_ERCC3_COMMON_DN	Details ...	444	0.46	2.31	0	0	0.001	3684	tags=48%, list=25%, signal=61%
	7	MARTORIATI_MDM4_TARGETS_FETAL_LIVER_UP	Details ...	189	0.51	2.3	0	0	0.001	650	tags=20%, list=4%, signal=20%
	8	NAKAYAMA_SOFT_TISSUE_TUMORS_PCA2_UP	Details ...	71	0.58	2.3	0	0	0.001	2210	tags=41%, list=15%, signal=48%
	9	REICHERT_MITOSIS_LIN9_TARGETS	Details ...	28	0.71	2.3	0	0	0.001	2842	tags=64%, list=19%, signal=79%
	10	SHEPARD_BMYB_TARGETS	Details ...	63	0.59	2.29	0	0	0.001	1739	tags=41%, list=12%, signal=46%
	11	GABRIELY_MIR21_TARGETS	Details ...	257	0.48	2.27	0	0	0.001	3507	tags=46%, list=23%, signal=59%
	12	SHEPARD_CRUSH_AND_BURN_MUTANT_DN	Details ...	146	0.52	2.27	0	0	0.001	2849	tags=43%, list=19%, signal=53%
	13	KEGG_P53_SIGNALING_PATHWAY	Details ...	55	0.6	2.26	0	0	0.003	1330	tags=33%, list=9%, signal=36%
	14	DACOSTA_UV_RESPONSE_VIA_ERCC3_XPCS_DN	Details ...	77	0.56	2.24	0	0	0.003	3028	tags=49%, list=20%, signal=62%
	15	MACAEVA_PBMC_RESPONSE_TO_IR	Details ...	69	0.57	2.2	0	0.001	0.009	1236	tags=25%, list=8%, signal=27%
9h Curated Pathways DONWREG
		GS	GS DETAILS	SIZE	ES	NES	NOM p-val	FDR q-val	FWER p-val	RANK AT MAX	LEADING EDGE
		follow link to MSigDB
	1	YAO_TEMPORAL_RESPONSE_TO_PROGESTERONE_CLUSTER_13	Details ...	157	-0.57	-2.71	0	0	0	3138	tags=52%, list=21%, signal=65%
	2	REACTOME_TRANSLATION	Details ...	137	-0.58	-2.71	0	0	0	3406	tags=56%, list=23%, signal=72%
	3	REACTOME_M_G1_TRANSITION	Details ...	75	-0.63	-2.67	0	0	0	2301	tags=52%, list=15%, signal=61%
	4	REACTOME_ER_PHAGOSOME_PATHWAY	Details ...	51	-0.68	-2.67	0	0	0	2301	tags=55%, list=15%, signal=65%
	5	KEGG_PROTEASOME	Details ...	40	-0.71	-2.67	0	0	0	2301	tags=63%, list=15%, signal=74%
	6	REACTOME_SRP_DEPENDENT_COTRANSLATIONAL_PROTEIN_TARGETING_TO_MEMBRANE	Details ...	102	-0.59	-2.66	0	0	0	3406	tags=56%, list=23%, signal=72%
	7	REACTOME_ASSEMBLY_OF_THE_PRE_REPLICATIVE_COMPLEX	Details ...	61	-0.65	-2.65	0	0	0	2301	tags=54%, list=15%, signal=64%
	8	REACTOME_ACTIVATION_OF_THE_MRNA_UPON_BINDING_OF_THE_CAP_BINDING_COMPLEX_AND_EIFS_AND_SUBSEQUENT_BINDING_TO_43S	Details ...	52	-0.67	-2.65	0	0	0	2596	tags=56%, list=17%, signal=67%
	9	REACTOME_FORMATION_OF_THE_TERNARY_COMPLEX_AND_SUBSEQUENTLY_THE_43S_COMPLEX	Details ...	44	-0.7	-2.64	0	0	0	2575	tags=59%, list=17%, signal=71%
	10	REACTOME_CDK_MEDIATED_PHOSPHORYLATION_AND_REMOVAL_OF_CDC6	Details ...	44	-0.68	-2.63	0	0	0	2301	tags=59%, list=15%, signal=70%
	11	REACTOME_DESTABILIZATION_OF_MRNA_BY_AUF1_HNRNP_D0	Details ...	47	-0.68	-2.62	0	0	0	2642	tags=62%, list=18%, signal=75%
	12	KEGG_OXIDATIVE_PHOSPHORYLATION	Details ...	98	-0.59	-2.61	0	0	0	3302	tags=54%, list=22%, signal=69%
	13	REACTOME_3_UTR_MEDIATED_TRANSLATIONAL_REGULATION	Details ...	98	-0.59	-2.61	0	0	0	3259	tags=56%, list=22%, signal=71%
	14	REACTOME_SCF_BETA_TRCP_MEDIATED_DEGRADATION_OF_EMI1	Details ...	46	-0.67	-2.6	0	0	0	2301	tags=54%, list=15%, signal=64%
	15	REACTOME_TCA_CYCLE_AND_RESPIRATORY_ELECTRON_TRANSPORT	Details ...	108	-0.58	-2.59	0	0	0	4211	tags=68%, list=28%, signal=93%
	16	REACTOME_CROSS_PRESENTATION_OF_SOLUBLE_EXOGENOUS_ANTIGENS_ENDOSOMES	Details ...	42	-0.7	-2.58	0	0	0	2301	tags=60%, list=15%, signal=70%
	17	REACTOME_INFLUENZA_VIRAL_RNA_TRANSCRIPTION_AND_REPLICATION	Details ...	96	-0.57	-2.57	0	0	0	3814	tags=61%, list=25%, signal=82%
	18	YAO_TEMPORAL_RESPONSE_TO_PROGESTERONE_CLUSTER_17	Details ...	168	-0.54	-2.57	0	0	0	3043	tags=49%, list=20%, signal=61%
	19	REACTOME_VIF_MEDIATED_DEGRADATION_OF_APOBEC3G	Details ...	46	-0.68	-2.56	0	0	0	2335	tags=57%, list=16%, signal=67%
	20	HSIAO_HOUSEKEEPING_GENES	Details ...	357	-0.48	-2.55	0	0	0	3259	tags=47%, list=22%, signal=58%
	21	REACTOME_RESPIRATORY_ELECTRON_TRANSPORT_ATP_SYNTHESIS_BY_CHEMIOSMOTIC_COUPLING_AND_HEAT_PRODUCTION_BY_UNCOUPLING_PROTEINS_		74	-0.6	-2.54	0	0	0	1896	tags=47%, list=13%, signal=54%
	22	REACTOME_PEPTIDE_CHAIN_ELONGATION		80	-0.59	-2.53	0	0	0	3814	tags=64%, list=25%, signal=85%
	23	REACTOME_REGULATION_OF_ORNITHINE_DECARBOXYLASE_ODC		45	-0.66	-2.52	0	0	0	2642	tags=58%, list=18%, signal=70%
	24	WONG_MITOCHONDRIA_GENE_MODULE		200	-0.51	-2.52	0	0	0	2583	tags=42%, list=17%, signal=49%
	25	PENG_LEUCINE_DEPRIVATION_DN		175	-0.51	-2.52	0	0	0	2805	tags=45%, list=19%, signal=54%
	26	KEGG_RIBOSOME		82	-0.58	-2.51	0	0	0	3814	tags=63%, list=25%, signal=85%
	27	KEGG_DNA_REPLICATION		35	-0.68	-2.49	0	0	0	2035	tags=54%, list=14%, signal=63%
	28	REACTOME_ANTIGEN_PROCESSING_CROSS_PRESENTATION		60	-0.62	-2.48	0	0	0	2301	tags=50%, list=15%, signal=59%
	29	REACTOME_RESPIRATORY_ELECTRON_TRANSPORT		61	-0.62	-2.48	0	0	0	3267	tags=62%, list=22%, signal=79%
	30	REACTOME_AUTODEGRADATION_OF_CDH1_BY_CDH1_APC_C		55	-0.62	-2.46	0	0	0	2301	tags=51%, list=15%, signal=60%
	31	REACTOME_METABOLISM_OF_MRNA		199	-0.5	-2.46	0	0	0	3048	tags=46%, list=20%, signal=57%
	32	KEGG_PARKINSONS_DISEASE		99	-0.55	-2.45	0	0	0	1896	tags=43%, list=13%, signal=49%
	33	CHNG_MULTIPLE_MYELOMA_HYPERPLOID_UP		50	-0.62	-2.44	0	0	0	3042	tags=62%, list=20%, signal=78%
	34	REACTOME_CDT1_ASSOCIATION_WITH_THE_CDC6_ORC_ORIGIN_COMPLEX		52	-0.62	-2.44	0	0	0	2301	tags=52%, list=15%, signal=61%
	35	MOOTHA_HUMAN_MITODB_6_2002		377	-0.46	-2.43	0	0	0	2422	tags=37%, list=16%, signal=43%
	36	BIOCARTA_PROTEASOME_PATHWAY		28	-0.71	-2.42	0	0	0	2301	tags=64%, list=15%, signal=76%
	37	REACTOME_AUTODEGRADATION_OF_THE_E3_UBIQUITIN_LIGASE_COP1		44	-0.65	-2.41	0	0	0	2642	tags=59%, list=18%, signal=72%
	38	REACTOME_REGULATION_OF_MRNA_STABILITY_BY_PROTEINS_THAT_BIND_AU_RICH_ELEMENTS		76	-0.56	-2.41	0	0	0	2975	tags=53%, list=20%, signal=65%
	39	MOOTHA_VOXPHOS		79	-0.55	-2.39	0	0	0	3302	tags=54%, list=22%, signal=69%
	40	LUI_TARGETS_OF_PAX8_PPARG_FUSION		31	-0.68	-2.39	0	0	0	2424	tags=52%, list=16%, signal=61%
	41	MOOTHA_MITOCHONDRIA		386	-0.44	-2.39	0	0	0	2422	tags=35%, list=16%, signal=41%
	42	PENG_RAPAMYCIN_RESPONSE_DN		221	-0.47	-2.38	0	0	0	3261	tags=46%, list=22%, signal=58%
	43	MENSSEN_MYC_TARGETS		48	-0.61	-2.38	0	0	0	2471	tags=56%, list=16%, signal=67%
	44	PELLICCIOTTA_HDAC_IN_ANTIGEN_PRESENTATION_UP		60	-0.59	-2.38	0	0	0	2599	tags=55%, list=17%, signal=66%
	45	BILANGES_SERUM_AND_RAPAMYCIN_SENSITIVE_GENES		67	-0.57	-2.37	0	0	0	3449	tags=60%, list=23%, signal=77%
	46	REACTOME_METABOLISM_OF_RNA		243	-0.47	-2.37	0	0	0	3814	tags=52%, list=25%, signal=68%
	47	REACTOME_P53_INDEPENDENT_G1_S_DNA_DAMAGE_CHECKPOINT		46	-0.61	-2.36	0	0	0	2301	tags=54%, list=15%, signal=64%
	48	CAFFAREL_RESPONSE_TO_THC_DN		25	-0.71	-2.35	0	0	0	2314	tags=60%, list=15%, signal=71%
	49	REACTOME_REGULATION_OF_APOPTOSIS		54	-0.58	-2.32	0	0	0	3473	tags=59%, list=23%, signal=77%
	50	REACTOME_ACTIVATION_OF_NF_KAPPAB_IN_B_CELLS		57	-0.59	-2.32	0	0	0	2642	tags=49%, list=18%, signal=59%
	51	PELLICCIOTTA_HDAC_IN_ANTIGEN_PRESENTATION_DN		44	-0.62	-2.29	0	0	0.003	2144	tags=48%, list=14%, signal=56%
	52	BURTON_ADIPOGENESIS_6		146	-0.47	-2.29	0	0	0.003	3245	tags=46%, list=22%, signal=58%
	53	KEGG_SPLICEOSOME		119	-0.5	-2.29	0	0	0.003	3410	tags=50%, list=23%, signal=64%
	54	REACTOME_APC_C_CDH1_MEDIATED_DEGRADATION_OF_CDC20_AND_OTHER_APC_C_CDH1_TARGETED_PROTEINS_IN_LATE_MITOSIS_EARLY_G1		62	-0.56	-2.28	0	0	0.003	2975	tags=52%, list=20%, signal=64%
	55	REACTOME_PREFOLDIN_MEDIATED_TRANSFER_OF_SUBSTRATE_TO_CCT_TRIC		23	-0.7	-2.27	0	0	0.005	1770	tags=61%, list=12%, signal=69%
	56	STARK_PREFRONTAL_CORTEX_22Q11_DELETION_DN		443	-0.42	-2.27	0	0	0.005	3604	tags=47%, list=24%, signal=59%
	57	REACTOME_DNA_STRAND_ELONGATION		30	-0.65	-2.26	0	0	0.005	2035	tags=53%, list=14%, signal=62%
	58	REACTOME_MITOCHONDRIAL_PROTEIN_IMPORT		46	-0.59	-2.26	0	0	0.005	1979	tags=43%, list=13%, signal=50%
	59	REACTOME_SYNTHESIS_OF_DNA		88	-0.52	-2.26	0	0	0.005	2144	tags=48%, list=14%, signal=55%
	60	REACTOME_HOST_INTERACTIONS_OF_HIV_FACTORS		108	-0.5	-2.25	0	0	0.005	2711	tags=44%, list=18%, signal=53%
	61	REACTOME_INFLUENZA_LIFE_CYCLE		130	-0.48	-2.24	0	0	0.005	3855	tags=54%, list=26%, signal=72%
	62	WANG_TUMOR_INVASIVENESS_UP		338	-0.42	-2.24	0	0	0.005	2876	tags=40%, list=19%, signal=48%
	63	REACTOME_METABOLISM_OF_PROTEINS		362	-0.42	-2.24	0	0	0.005	3406	tags=42%, list=23%, signal=53%
	64	REACTOME_APC_C_CDC20_MEDIATED_DEGRADATION_OF_MITOTIC_PROTEINS		63	-0.54	-2.24	0	0	0.005	2975	tags=52%, list=20%, signal=65%
	65	REACTOME_NONSENSE_MEDIATED_DECAY_ENHANCED_BY_THE_EXON_JUNCTION_COMPLEX		101	-0.5	-2.23	0	0	0.005	3883	tags=56%, list=26%, signal=76%
	66	KEGG_PATHOGENIC_ESCHERICHIA_COLI_INFECTION		40	-0.59	-2.22	0	0	0.005	1576	tags=38%, list=11%, signal=42%
	67	GAVIN_FOXP3_TARGETS_CLUSTER_T7		84	-0.51	-2.22	0	0	0.005	1642	tags=36%, list=11%, signal=40%
	68	LI_AMPLIFIED_IN_LUNG_CANCER		141	-0.47	-2.22	0	0	0.005	2703	tags=42%, list=18%, signal=51%
	69	REACTOME_G1_S_TRANSITION		102	-0.5	-2.21	0	0	0.008	2301	tags=44%, list=15%, signal=52%
	70	REACTOME_PYRUVATE_METABOLISM_AND_CITRIC_ACID_TCA_CYCLE		38	-0.59	-2.21	0	0	0.009	3959	tags=66%, list=26%, signal=89%
	71	BILANGES_RAPAMYCIN_SENSITIVE_VIA_TSC1_AND_TSC2		66	-0.53	-2.2	0	0	0.009	3639	tags=58%, list=24%, signal=76%

## Sheet: +9h GO
9g GO UPREG
	GO_MICROTUBULE_MOTOR_ACTIVITY	GO_MICROTUBULE_MOTOR_ACTIVITY	Details ...	51	0.646932	2.42509	0	0	0	3922	tags=65%, list=26%, signal=87%
	GO_KINESIN_COMPLEX	GO_KINESIN_COMPLEX	Details ...	45	0.639842	2.26599	0	0.00108275	0.002	3794	tags=64%, list=25%, signal=86%
	GO_INTRINSIC_APOPTOTIC_SIGNALING_PATHWAY_BY_P53_CLASS_MEDIATOR	GO_INTRINSIC_APOPTOTIC_SIGNALING_PATHWAY_BY_P53_CLASS_MEDIATOR	Details ...	38	0.647473	2.25964	0	0.000721832	0.002	1272	tags=32%, list=8%, signal=34%
9g GO DOWNREG
	GO_RIBOSOMAL_SUBUNIT	GO_RIBOSOMAL_SUBUNIT	Details ...	149	-0.573178	-2.73029	0	0	0	3814	tags=59%, list=25%, signal=78%
	GO_SMALL_RIBOSOMAL_SUBUNIT	GO_SMALL_RIBOSOMAL_SUBUNIT	Details ...	63	-0.655115	-2.67628	0	0	0	2317	tags=52%, list=15%, signal=62%
	GO_RIBOSOME	GO_RIBOSOME	Details ...	206	-0.532461	-2.64284	0	0	0	3083	tags=48%, list=21%, signal=59%
	GO_STRUCTURAL_CONSTITUENT_OF_RIBOSOME	GO_STRUCTURAL_CONSTITUENT_OF_RIBOSOME	Details ...	186	-0.53844	-2.63192	0	0	0	3827	tags=55%, list=26%, signal=73%
	GO_MITOCHONDRIAL_PROTEIN_COMPLEX	GO_MITOCHONDRIAL_PROTEIN_COMPLEX	Details ...	118	-0.559329	-2.58594	0	0	0	2366	tags=46%, list=16%, signal=54%
	GO_OXIDATIVE_PHOSPHORYLATION	GO_OXIDATIVE_PHOSPHORYLATION	Details ...	76	-0.603069	-2.58539	0	0	0	3267	tags=59%, list=22%, signal=75%
	GO_RESPIRATORY_CHAIN	GO_RESPIRATORY_CHAIN	Details ...	70	-0.611998	-2.57805	0	0	0	3267	tags=60%, list=22%, signal=76%
	GO_CYTOSOLIC_SMALL_RIBOSOMAL_SUBUNIT	GO_CYTOSOLIC_SMALL_RIBOSOMAL_SUBUNIT	Details ...	39	-0.688209	-2.55543	0	0	0	2317	tags=54%, list=15%, signal=64%
	GO_MITOCHONDRIAL_TRANSLATION	GO_MITOCHONDRIAL_TRANSLATION	Details ...	105	-0.556648	-2.53538	0	0	0	3645	tags=55%, list=24%, signal=72%
	GO_TRANSLATIONAL_INITIATION	GO_TRANSLATIONAL_INITIATION	Details ...	134	-0.540331	-2.52917	0	0	0	3259	tags=53%, list=22%, signal=67%
	GO_TRANSLATIONAL_TERMINATION	GO_TRANSLATIONAL_TERMINATION	Details ...	90	-0.577894	-2.5237	0	0	0	3645	tags=57%, list=24%, signal=74%
	GO_TRANSLATIONAL_ELONGATION	GO_TRANSLATIONAL_ELONGATION	Details ...	106	-0.565426	-2.52301	0	0	0	2918	tags=49%, list=19%, signal=60%
	GO_ORGANELLE_INNER_MEMBRANE	GO_ORGANELLE_INNER_MEMBRANE	Details ...	434	-0.467051	-2.49705	0	0	0	2505	tags=38%, list=17%, signal=44%
	GO_AMIDE_BIOSYNTHETIC_PROCESS	GO_AMIDE_BIOSYNTHETIC_PROCESS	Details ...	439	-0.455581	-2.48196	0	0	0	3115	tags=42%, list=21%, signal=52%
	GO_INNER_MITOCHONDRIAL_MEMBRANE_PROTEIN_COMPLEX	GO_INNER_MITOCHONDRIAL_MEMBRANE_PROTEIN_COMPLEX	Details ...	90	-0.568992	-2.47044	0	0	0	2366	tags=44%, list=16%, signal=52%
	GO_PROTEASOME_COMPLEX	GO_PROTEASOME_COMPLEX	Details ...	69	-0.591419	-2.44998	0	0	0	2863	tags=54%, list=19%, signal=66%
	GO_ELECTRON_TRANSPORT_CHAIN	GO_ELECTRON_TRANSPORT_CHAIN	Details ...	86	-0.564512	-2.43299	0	0	0	3267	tags=53%, list=22%, signal=68%
	GO_CELLULAR_RESPIRATION	GO_CELLULAR_RESPIRATION	Details ...	127	-0.521951	-2.41636	0	4.99025e-05	0.001	3839	tags=57%, list=26%, signal=76%
	GO_OXIDOREDUCTASE_COMPLEX	GO_OXIDOREDUCTASE_COMPLEX	Details ...	83	-0.551587	-2.40662	0	0.000140522	0.003	3267	tags=52%, list=22%, signal=66%
	GO_ESTABLISHMENT_OF_PROTEIN_LOCALIZATION_TO_ENDOPLASMIC_RETICULUM	GO_ESTABLISHMENT_OF_PROTEIN_LOCALIZATION_TO_ENDOPLASMIC_RETICULUM	Details ...	98	-0.535856	-2.3946	0	0.000133496	0.003	3406	tags=53%, list=23%, signal=68%
	GO_PEPTIDE_METABOLIC_PROCESS	GO_PEPTIDE_METABOLIC_PROCESS		468	-0.441812	-2.39274	0	0.000127139	0.003	3115	tags=42%, list=21%, signal=52%
	GO_CYTOSOLIC_RIBOSOME	GO_CYTOSOLIC_RIBOSOME		99	-0.537348	-2.37892	0	0.00012136	0.003	3814	tags=56%, list=25%, signal=74%
	GO_ORGANELLAR_RIBOSOME	GO_ORGANELLAR_RIBOSOME		70	-0.563952	-2.37764	0	0.000116084	0.003	3596	tags=54%, list=24%, signal=71%
	GO_LARGE_RIBOSOMAL_SUBUNIT	GO_LARGE_RIBOSOMAL_SUBUNIT		86	-0.544734	-2.36604	0	0.000147113	0.004	3814	tags=58%, list=25%, signal=78%
	GO_PROTEASOME_ACCESSORY_COMPLEX	GO_PROTEASOME_ACCESSORY_COMPLEX		24	-0.721698	-2.35011	0	0.000141229	0.004	2144	tags=63%, list=14%, signal=73%
	GO_REGULATION_OF_CELLULAR_AMINO_ACID_METABOLIC_PROCESS	GO_REGULATION_OF_CELLULAR_AMINO_ACID_METABOLIC_PROCESS		53	-0.592919	-2.34981	0	0.000135797	0.004	2642	tags=55%, list=18%, signal=66%
	GO_PROTEIN_LOCALIZATION_TO_ENDOPLASMIC_RETICULUM	GO_PROTEIN_LOCALIZATION_TO_ENDOPLASMIC_RETICULUM		116	-0.514184	-2.34519	0	0.000130767	0.004	3406	tags=52%, list=23%, signal=66%
	GO_ANTIGEN_PROCESSING_AND_PRESENTATION_OF_EXOGENOUS_PEPTIDE_ANTIGEN_VIA_MHC_CLASS_I	GO_ANTIGEN_PROCESSING_AND_PRESENTATION_OF_EXOGENOUS_PEPTIDE_ANTIGEN_VIA_MHC_CLASS_I		51	-0.598404	-2.3327	0	0.000126097	0.004	2301	tags=49%, list=15%, signal=58%
	GO_AEROBIC_RESPIRATION	GO_AEROBIC_RESPIRATION		45	-0.605586	-2.32662	0	0.000121749	0.004	3700	tags=64%, list=25%, signal=85%
	GO_MITOCHONDRIAL_RESPIRATORY_CHAIN_COMPLEX_ASSEMBLY	GO_MITOCHONDRIAL_RESPIRATORY_CHAIN_COMPLEX_ASSEMBLY		62	-0.565766	-2.31368	0	0.000117691	0.004	3655	tags=58%, list=24%, signal=76%
	GO_CHAPERONE_MEDIATED_PROTEIN_FOLDING	GO_CHAPERONE_MEDIATED_PROTEIN_FOLDING		43	-0.601738	-2.31052	0	0.000113894	0.004	2422	tags=51%, list=16%, signal=61%
	GO_NIK_NF_KAPPAB_SIGNALING	GO_NIK_NF_KAPPAB_SIGNALING		73	-0.547516	-2.29383	0	0.000137253	0.005	3473	tags=51%, list=23%, signal=66%
	GO_PROTEIN_TRANSMEMBRANE_TRANSPORT	GO_PROTEIN_TRANSMEMBRANE_TRANSPORT		46	-0.60532	-2.29022	0	0.000133094	0.005	2305	tags=41%, list=15%, signal=49%
	GO_NUCLEOSIDE_TRIPHOSPHATE_METABOLIC_PROCESS	GO_NUCLEOSIDE_TRIPHOSPHATE_METABOLIC_PROCESS		183	-0.468181	-2.27706	0	0.000129179	0.005	3416	tags=46%, list=23%, signal=59%
	GO_CYTOSOLIC_PART	GO_CYTOSOLIC_PART		173	-0.468351	-2.27048	0	0.000125488	0.005	3259	tags=45%, list=22%, signal=56%
	GO_MITOCHONDRIAL_MEMBRANE_PART	GO_MITOCHONDRIAL_MEMBRANE_PART		146	-0.47789	-2.25672	0	0.000170186	0.007	2406	tags=38%, list=16%, signal=45%
	GO_CATALYTIC_STEP_2_SPLICEOSOME	GO_CATALYTIC_STEP_2_SPLICEOSOME		84	-0.518929	-2.25499	0	0.000165586	0.007	3410	tags=51%, list=23%, signal=66%
	GO_MITOCHONDRIAL_RESPIRATORY_CHAIN_COMPLEX_I_BIOGENESIS	GO_MITOCHONDRIAL_RESPIRATORY_CHAIN_COMPLEX_I_BIOGENESIS		49	-0.570085	-2.25246	0	0.000161229	0.007	3655	tags=59%, list=24%, signal=78%
	GO_OXIDOREDUCTASE_ACTIVITY_ACTING_ON_NAD_P_H_QUINONE_OR_SIMILAR_COMPOUND_AS_ACCEPTOR	GO_OXIDOREDUCTASE_ACTIVITY_ACTING_ON_NAD_P_H_QUINONE_OR_SIMILAR_COMPOUND_AS_ACCEPTOR		43	-0.585574	-2.23669	0	0.000157095	0.007	2612	tags=51%, list=17%, signal=62%
	GO_NUCLEOSIDE_MONOPHOSPHATE_METABOLIC_PROCESS	GO_NUCLEOSIDE_MONOPHOSPHATE_METABOLIC_PROCESS		194	-0.459287	-2.2294	0	0.000174862	0.008	2800	tags=41%, list=19%, signal=50%
